# Supplementary material for: Magnetic Nanoparticle-Based Dianthin Targeting for Controlled Drug Release Using the Endosomal Escape Enhancer SO1861
Source: MDPI journal article supplement (doi:10.3390/nano11041057), 2021-04-20
Supplement: s1 [file s1]

# Magnetic Nanoparticle-based Dianthin Targeting for Controlled Drug Release using the Endosomal Escape Enhancer SO1861

*A. Zarinwall<sup>1,2,3</sup>, M. Asadian-Birjand<sup>3</sup>, D. Ag Seleci<sup>1,2</sup>, V. Maurer<sup>1,2</sup>, Alexandra Trautner<sup>3</sup>,  
G. Garnweitner<sup>1,2\*</sup> & H. Fuchs<sup>3</sup>*

<sup>1</sup> Institute for Particle Technology (iPAT) | Technische Universität Braunschweig | 38104  
Braunschweig, Germany

<sup>2</sup> Center of Pharmaceutical Engineering Research (PVZ) | Technische Universität  
Braunschweig | 38106 Braunschweig, Germany

<sup>3</sup> Charité – Universitätsmedizin Berlin, corporate member of Freie Universität Berlin and  
Humboldt-Universität zu Berlin | Institute of Laboratory Medicine, Clinical Chemistry  
and Pathobiochemistry | 13353 Berlin, Germany

---

\* correspondence to: g.garnweitner@tu-braunschweig.de

## Table of Content

1. Additional technical details
2. Figure S1: Schematic representation of each modification step
3. Figure S2: SDS/PAGE electrophoresis of Dia and DiaEGF
4. Figure S3: MALDI-TOF spectra of Dia
5. Figure S4: MALDI-TOF spectra of DiaEGF
6. Figure S5: XRD diffractogram of SPIONs
7. Figure S6: FTIR spectra of SPIONs after each step of functionalization
8. Figure S7: DLS measurement of SPION-SO1861
9. Figure S8: Cytotoxicity studies of Dia-PEG<sub>12</sub>-N<sub>3</sub> and DiaEGF-PEG<sub>12</sub>-N<sub>3</sub> on HCT-116
10. Figure S9: Self-cytotoxicity of SO1861 on HCT-116
11. Figure S10: Self-cytotoxicity of SPION-SO1861 on HCT-116

### **Additional technical details**

**X-ray diffraction (XRD)** was performed on an Empyrean system from Malvern Panalytical with Cu K $\alpha$  radiation on a Si sample holder in a range of  $2\theta$  from 20 to 90° and a step size of 0.05°. Evaluation was accomplished by database research using the Inorganic Crystal Structure Database (ICSD).

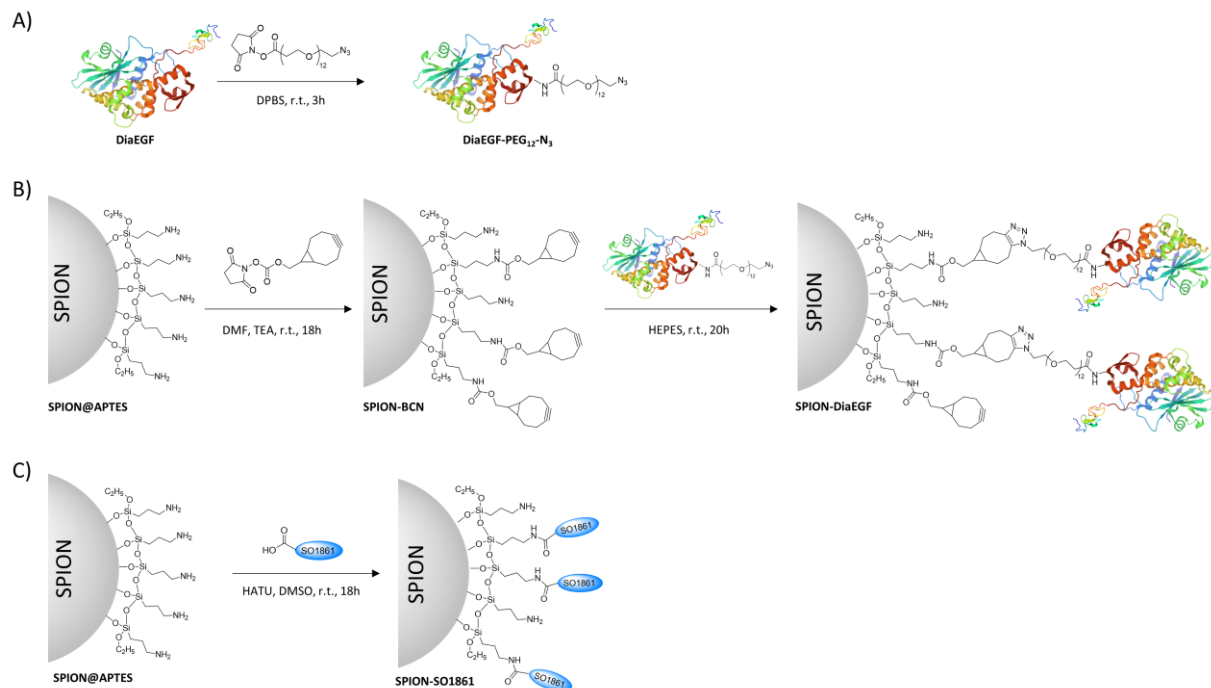

**Figure S1.** Schematic representation of the respective modification steps: A) Conjugation of the NHS-PEG<sub>12</sub>-N<sub>3</sub> linker to DiaEGF; B) functionalization of APTES-modified SPIONs (SPION@APTES) with NHS-BCN followed by DiaEGF-PEG<sub>12</sub>-N<sub>3</sub>; C) Coordination of SO1861 on SPION@APTES.

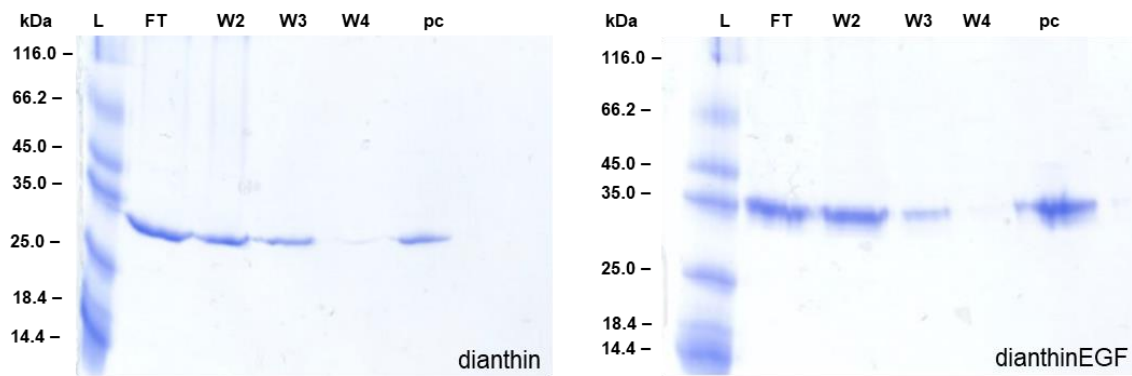

**Figure S2.** SDS/PAGE (12%) of the purified fractions of Dia and DiaEGF obtained after Ni-NTA and chitin column tandem affinity chromatography. L, Ladder; FT, flow-through; W, washout; pc, positive control (confirmed previous batch).

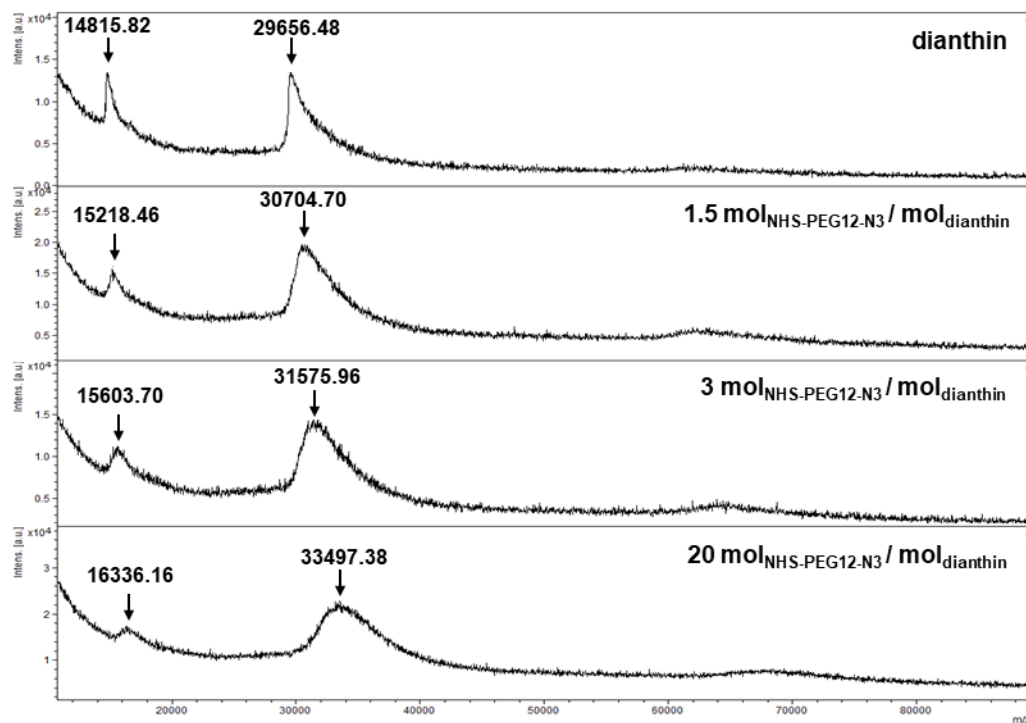

**Figure S3.** MALDI-TOF-MS spectra of Dia and conjugates with different molar ratios of linker:Dia.

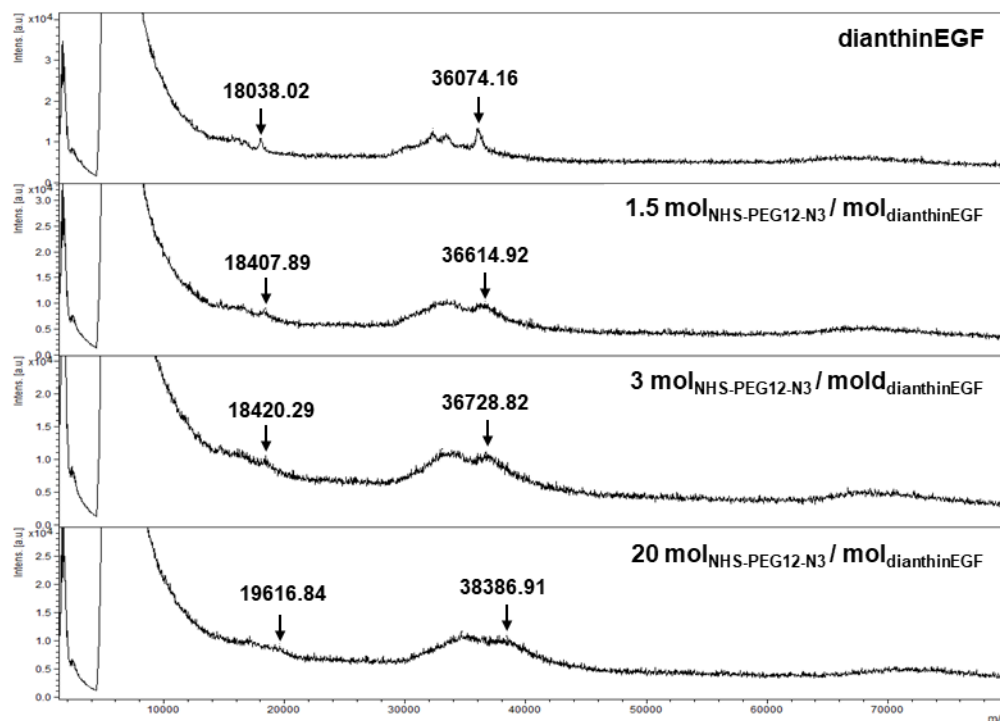

**Figure S4.** MALDI-TOF-MS spectra of DiaEGF and conjugates obtained from different initial molar ratios of linker:DiaEGF in the reaction mixture. The peaks appearing at approximately 32730 g/mol are attributable to degradation products of DiaEGF.

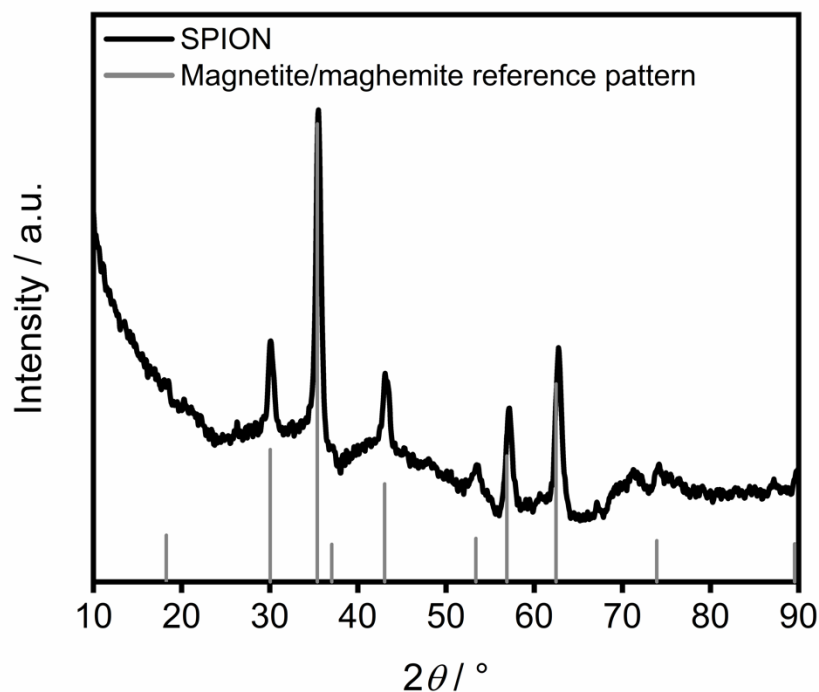

**Figure S5.** X-ray diffractogram of synthesized SPIONs and reference pattern of magnetite/maghemite. The initial decrease in the curve implies an amorphous fraction on the particle surface. According to the inorganic crystal structure database (ICSD 98-002-0596), the reflections obtained at 30°, 35°, 43°, 57° and 62° are attributable to a mixed crystalline phase of magnetite and maghemite. Applying the Debye-Scherrer equation to the highest intensity reflection at 35.5° with a full width at half maximum (FWHM) of 0.7°,  $K_S$  of 0.9 and wavelength  $\lambda$  of 0.154 nm, a crystallite size of 12.8 nm was determined.

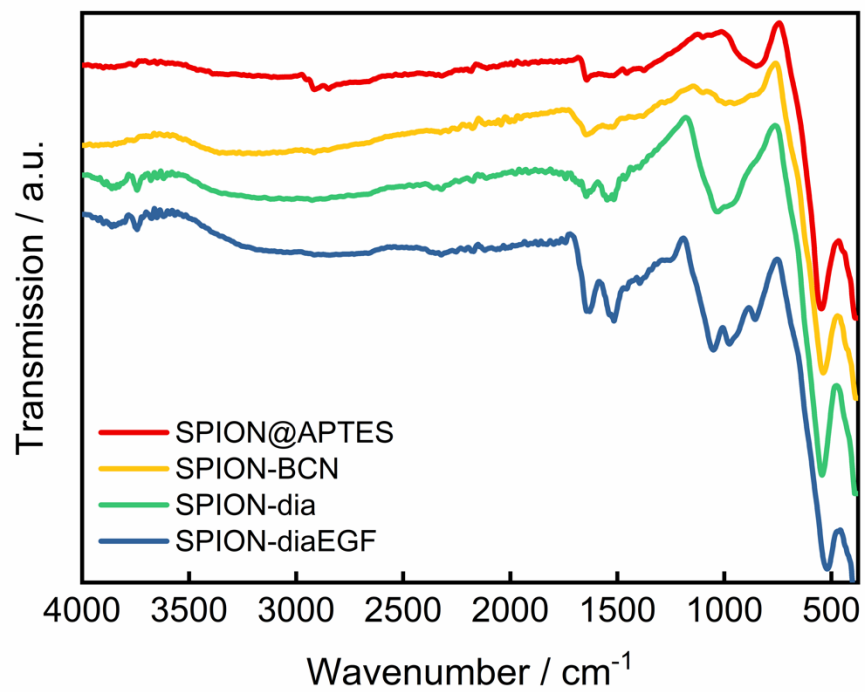

**Figure S6.** FTIR spectra of SPIONs after each functionalization step.



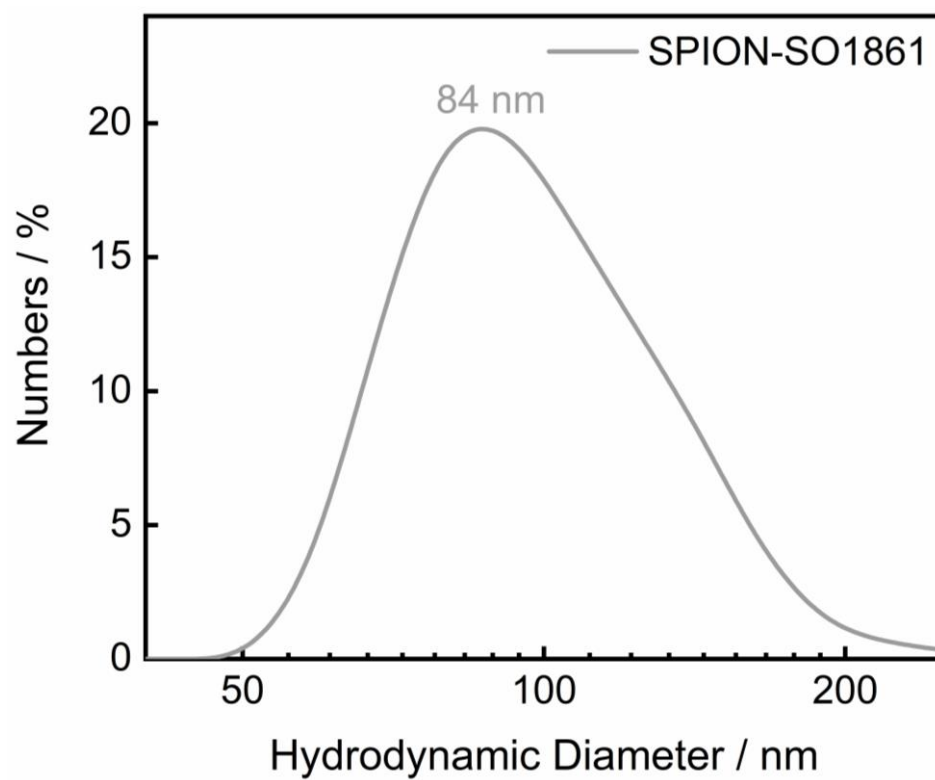

**Figure S7.** DLS measurement of SPION-SO1861 revealing a median size of 84 nm.

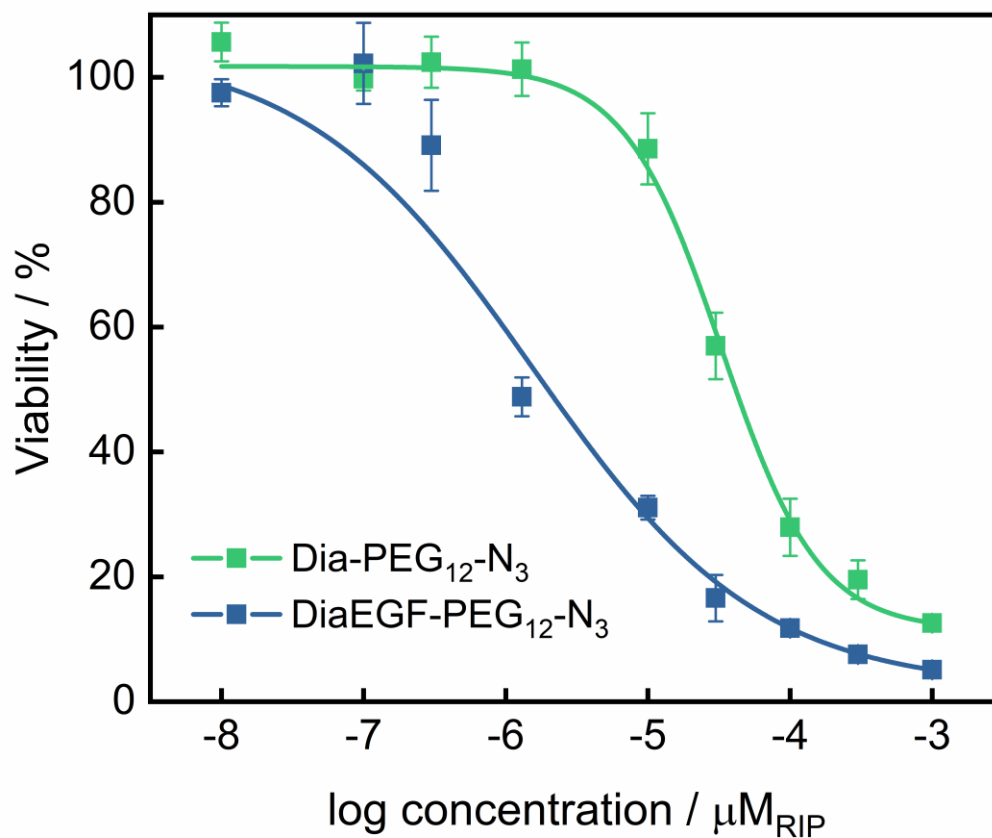

**Figure S8.** Cytotoxicity studies of Dia and DiaEGF conjugates on EGFR-overexpressing HCT-116 cells. Cell viability was assessed after 48 h by MTT-assay and plotted as a function of the RIP concentration. The experiment was performed in quadruplicates. Accordingly, Dia-PEG<sub>12</sub>-N<sub>3</sub> and DiaEGF-PEG<sub>12</sub>-N<sub>3</sub> have an IC<sub>50</sub> value of  $4.3 \cdot 10^{-5}$  M and  $1.2 \cdot 10^{-6}$   $\mu\text{M}$ , respectively.

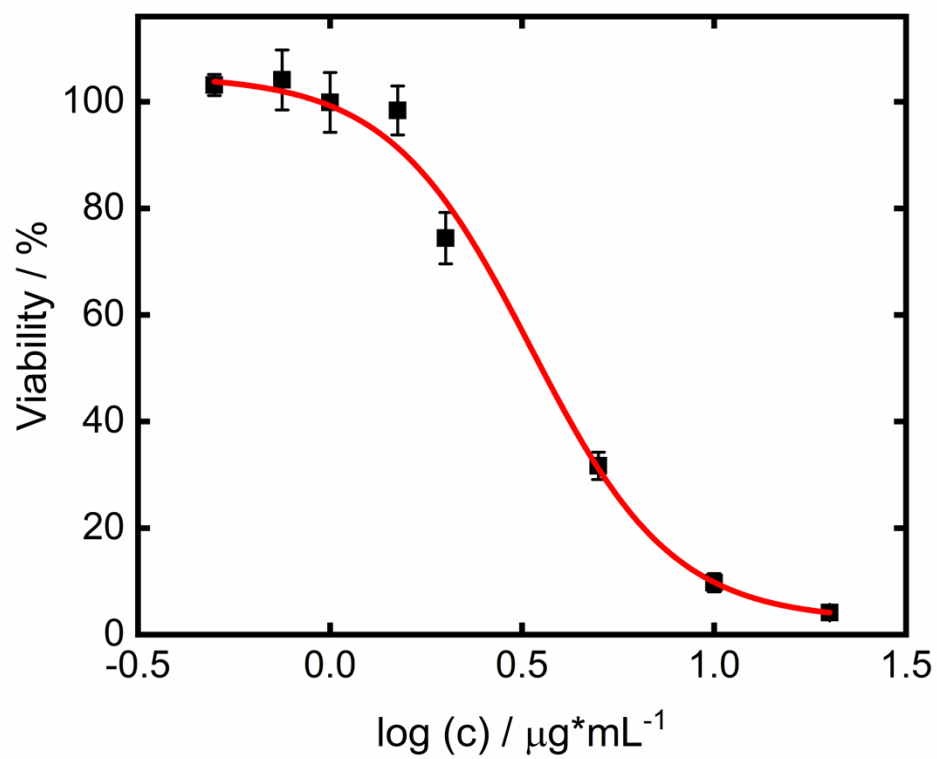

**Figure S9.** Self-cytotoxicity of SO1861 on HCT-116. The derived IC<sub>50</sub> value accounts for 3.3 μg/mL.

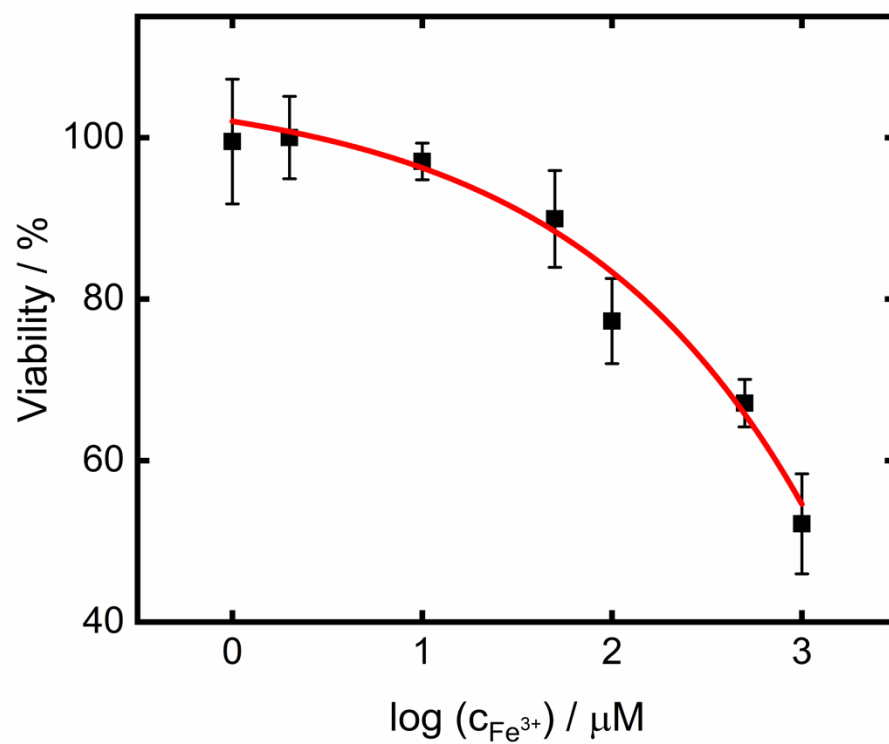

**Figure S10.** Self-cytotoxicity of SPION-SO1861 on HCT-116. The IC<sub>50</sub> value is determined as  $> 1 \text{ mM Fe}^{3+}$ .
